# Supplementary material for: Identifying Mitochondrial‐Related Genes NDUFA10 and NDUFV2 as Prognostic Markers for Prostate Cancer through Biclustering
Source: Hindawi journal article supplement (doi:10.1155/2021/5512624), 2021-01-01

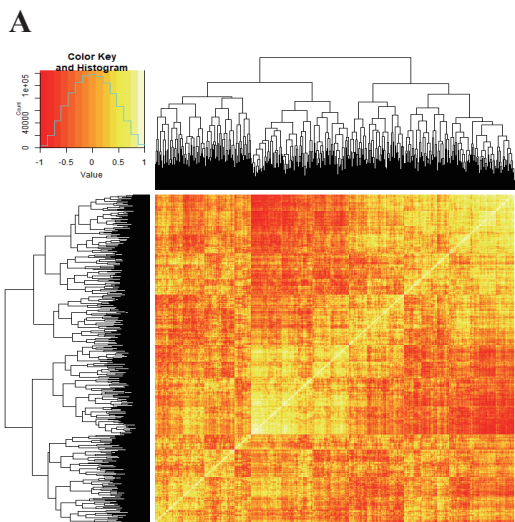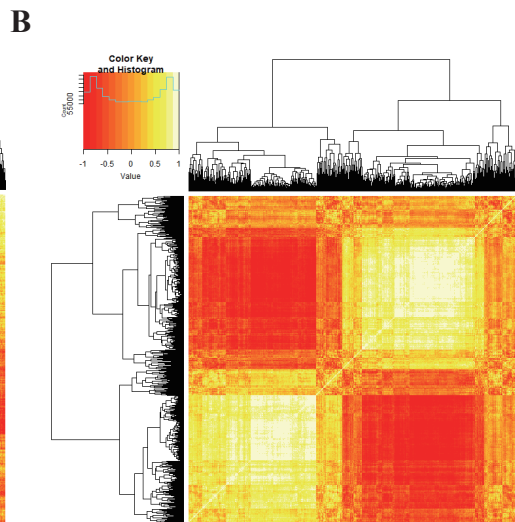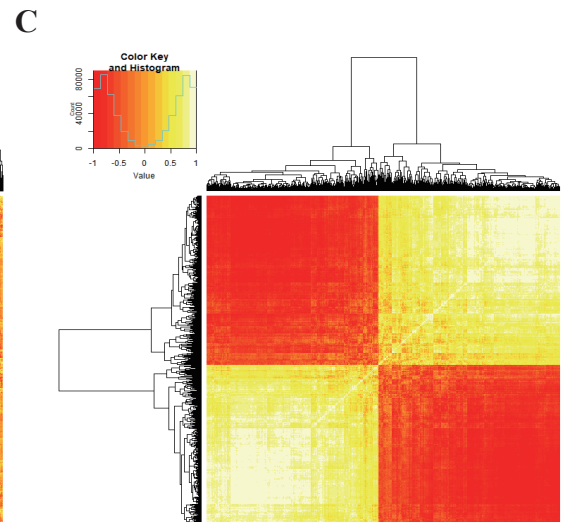

Supplement: f2 [file 5512624.f2.pdf]
